1 Contact information for corresponding author: [evanwcraig@gmail.com](mailto:evanwcraig@gmail.com)

2 Field Museum of Natural History, Chicago, IL 60605, USA

3 Running Header: Small mammal distributions in Simien Mts

4 **Small terrestrial mammal distributions in Simien Mountains National Park, Ethiopia: A**  
5 **reassessment after 88 years**

6 Evan W. Craig\*, William T. Stanley†, Julian C. Kerbis Peterhans, Josef Bryja, and Yonas

7 Meheretu

8 *Gantz Family Collections Center, Science and Education, Field Museum of Natural History,*

9 *Chicago, IL, 60605 USA (EWC, WTS, JCKP); College of Arts & Sciences, Roosevelt University,*

10 *Chicago, IL, 60605 USA (JCKP); Institute of Vertebrate Biology, Czech Academy of Sciences,*

11 *Brno, Czech Republic, and Masaryk University, Faculty of Science, Department of Botany and*

12 *Zoology, Brno, Czech Republic (JB); Department of Biology and Institute of Mountain Research*

13 *& Development, Mekelle University, Mekelle, Ethiopia (YM)*

14 *\*Correspondent: [evanwcraig@gmail.com](mailto:evanwcraig@gmail.com)*

15

16 † Dr. William T. Stanley devoted much of his career to the study of small mammals in East

17 Africa. He passed away unexpectedly during the fieldwork in Ethiopia on 6 October 2015.

18

19 Little is known about the distribution and ecology of small mammals inhabiting Simien

20 Mountains National Park despite the presence of mostly endemic species. Prior to this study, the

21 most comprehensive dataset was collected in 1927. This provides a unique opportunity to assess

22 the possible role of climate change over the last 88 years on the elevational distribution of

23 mammals in the Ethiopian highlands. Between September and November 2015, three of us

24 (EWC, WTS, YM) collected non-volant small mammals at four sites (2900, 3250, 3600, and

25 4000 m a.s.l.) along the western slope of the Simien Mountains using standardized sampling.  
26 Over a four-week period we recorded 13 species, comprising 11 rodents and two shrews, all  
27 endemic to the Ethiopian Plateau. We found greatest species richness at mid-elevations (3250 m),  
28 consistent with a general pattern found on many other mountains worldwide but less so in Africa.  
29 We discovered one potentially new species of shrew. No previously unrecorded rodent species  
30 were observed. Finally, we compared our species distribution results to the 1927 dataset and  
31 found upward elevational shifts in species ranges, suggesting the role and influence of climate  
32 change on the small mammal community. Simien Mountains National Park represents an  
33 exceptionally valuable core area of endemism and the best protected natural habitat in northern  
34 Ethiopia.

35 .  
36 Key words: small mammals; elevational gradients; range shifts; climate change; endemic species;  
37 species richness; Simien Mountains; Ethiopia

38  
39 Understanding the distributions of organisms along elevational gradients is vital to comprehend  
40 the evolution and ecology of montane biotic systems, and to facilitate effective conservation  
41 strategies to maintain them. Gathering such baseline data is necessary to monitor any changes  
42 that may be occurring due to climate change, ecological perturbations, and impacts caused by  
43 human activity (Walther et al. 2002; Rowe et al. 2010; Chen et al. 2011; Sundqvist et al. 2013).  
44 This has been illustrated by Moritz et al. (2008) who revealed significant elevational shifts in the  
45 distributions of various mammalian species in Yosemite National Park, USA over a 100 year  
46 period as a result of increasing global temperatures, and by Ejigu et al. (2017) who associated  
47 human-related activities with a shift in walia ibex (*Capra walie*) ranges in the Simien Mountains  
48 of Ethiopia.

49 Temporal variations in the elevational distributions of natural communities provide an  
50 indication to the rate at which change occurs. Accurately predicting the ecological consequences  
51 of changing habitats, however, requires an understanding of the relationship of biotic variables  
52 with species occurrence. One notable development recently changed what had been a  
53 fundamental assumption regarding biodiversity along elevational gradients. Emerging evidence  
54 suggests that species richness is typically greatest at mid-elevations (Rahbek 2005), as opposed to  
55 the prior notion of an inverse linear relationship between richness and elevation (MacArthur  
56 1972). Support for small mammals exhibiting this mid-elevational peak was provided in 2005 by  
57 the assessment of 56 published montane diversity surveys, only four of which did not report  
58 greatest richness at mid-elevations (McCain 2005). However, despite mounting global evidence  
59 in favor of this general pattern, such “hump-shaped” distributions of non-volant small mammals  
60 in Africa have been infrequently documented (Taylor et al. 2015).

61 Ethiopia is home to the largest Afroalpine ecosystem (areas above approximately 3200  
62 m), which is disjointedly distributed across several isolated massifs (Yalden 1988). The isolated  
63 massifs are the result of the great Ethiopian volcanic eruptions ca. 30 Ma (Hofmann et al. 1997).  
64 High isolated plateaus combined with unique environmental conditions have resulted in  
65 significant faunal and floral endemism. With the exception of two murid rodents, nearly all  
66 (96%) of the 55 mammals currently reported as endemic to Ethiopia are restricted to the plateau,  
67 and approximately half (47%;  $n = 26$ ) live in the highlands (Lavrenchenko and Bekele 2017). The  
68 IUCN Small Mammal Specialist Group has identified these Ethiopian montane grasslands and  
69 woodlands as a key region for conservation (IUCN 2019).

70 Simien Mountains National Park (SMNP) was established in 1969 and recognized as a  
71 UNESCO World Heritage Site in 1978 (UNESCO 2019). Home to Ras Dashen, the highest  
72 mountain in Ethiopia and tenth highest in Africa, the park has long been a subject of interest to

73 researchers with its populations of rare and endemic species. This montane “sky island” contains  
74 iconic mammalian species, such as the Ethiopian wolf (*Canis simiensis*), gelada (*Theropithecus*  
75 *gelada*), and walia ibex (*Capra walie*); the smaller mammals are less well known.

76 In 2015, we (EWC, WTS, YM) conducted an elevational survey in SMNP to reassess the  
77 small mammal community. This collaborative study between Mekelle University and the Field  
78 Museum of Natural History (FMNH) marked nearly a century-long return to the Simien  
79 Mountains following former FMNH Curator of Zoology, W.H. Osgood’s historic Chicago Daily  
80 News Abyssinian Expedition (hereafter “Abyssinian Expedition”) of 1927. Although Osgood  
81 published some results of the Abyssinian Expedition, including species accounts and descriptions  
82 of new species (Fuentes and Osgood 1936; Osgood 1936), sampling results such as species  
83 abundance and distribution data were not reported. By referencing Osgood’s collection and  
84 associated documents from the Abyssinian Expedition deposited at FMNH, we provide an 88-  
85 year reassessment of small mammal distributions along the same route in SMNP.

86 Outside Africa, small mammal redone surveys have revealed elevational shifts in species  
87 ranges, likely as a response to climate change (Moritz et al. 2008; Rowe et al. 2010). Given the  
88 global influence of climate change, we hypothesize that the SMNP community has responded  
89 similarly to warming temperatures through elevational shifts in species distributions. Our study  
90 objectives were: 1) to assess the current elevational distribution of non-volant small mammal  
91 diversity in Simien Mountains National Park, Ethiopia; 2) to evaluate the efficacy of, and identify  
92 sampling biases associated with different trapping techniques for small mammal diversity  
93 assessments; and 3) to compare our results to those of the Abyssinian Expedition in 1927, and  
94 assess shifts in species distributions.

95

96

## MATERIALS AND METHODS

97            *Study area.*—Simien Mountains National Park covers an area of 412 km<sup>2</sup> and is located  
98 between about 13°-13.5° N, and 37.8°-38.5° E in the Amhara Regional State, Ethiopia (Fig. 1).  
99 The mountain range is entirely made up of flood basalt, the product of volcanic eruptions during  
100 the Oligocene-Miocene epoch (Hofmann et al. 1997). The landscape within SMNP exhibits a  
101 variety of habitat types along its elevational profile that range from Afromontane forests at the  
102 base of the massif to Afroalpine meadows nearest the summit. The Simien Mountains experience  
103 a unimodal pattern of rainfall that varies in volume from north (drier) to south (wetter) due to the  
104 1000 m-high escarpment’s rain shadow effect (Jacob et al. 2017). The wet season generally  
105 occurs between May and September. Rainfall data collected at Chennek camp (3600 m.a.s.l. site  
106 sampled in this study) shows an annual total average of 825.7 mm with the highest monthly  
107 averages occurring in July (287.2 mm; Chernet 2015).

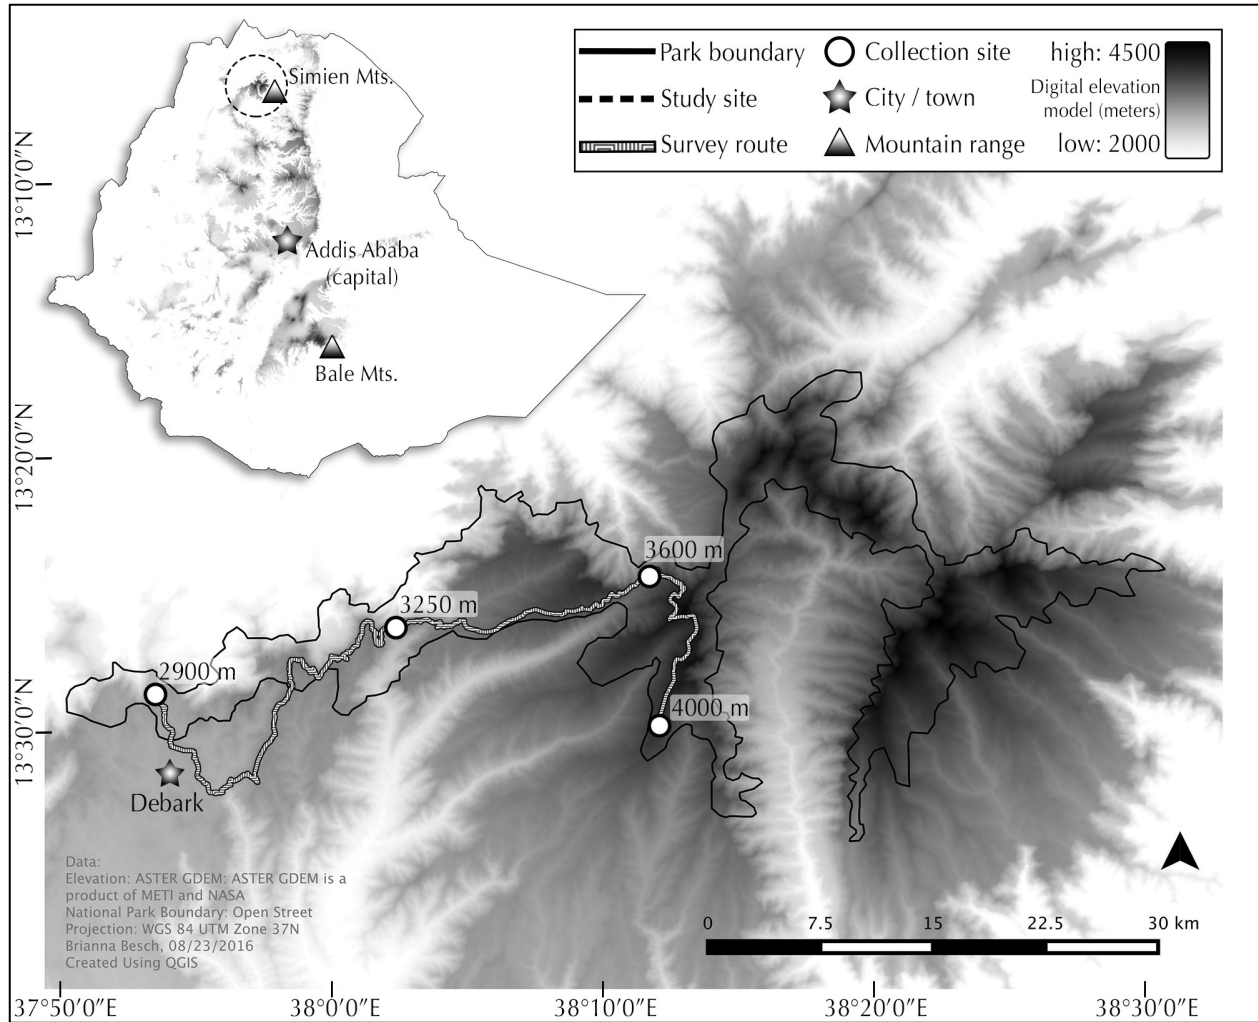

108

109 Fig. 1.—Map of Simien Mountains National Park, Ethiopia showing study sites, survey route, and country  
110 reference.

111

112 A single unpaved road provides vehicle access to settlements and scout camps along the  
113 western aspect of the massif. Between 21 September and 28 November 2015, we sampled the  
114 small mammal populations along this route at four different sites spanning an elevational range of  
115 roughly 1100 m (Fig. 2). Elevations, camp names, specific localities, sampling dates, and habitat  
116 notes associated with each site are presented below. Elevations for each site reference the center  
117 of the associated camp (to the nearest 50 m) with sampling efforts extending roughly 50 m above  
118 or below this point.

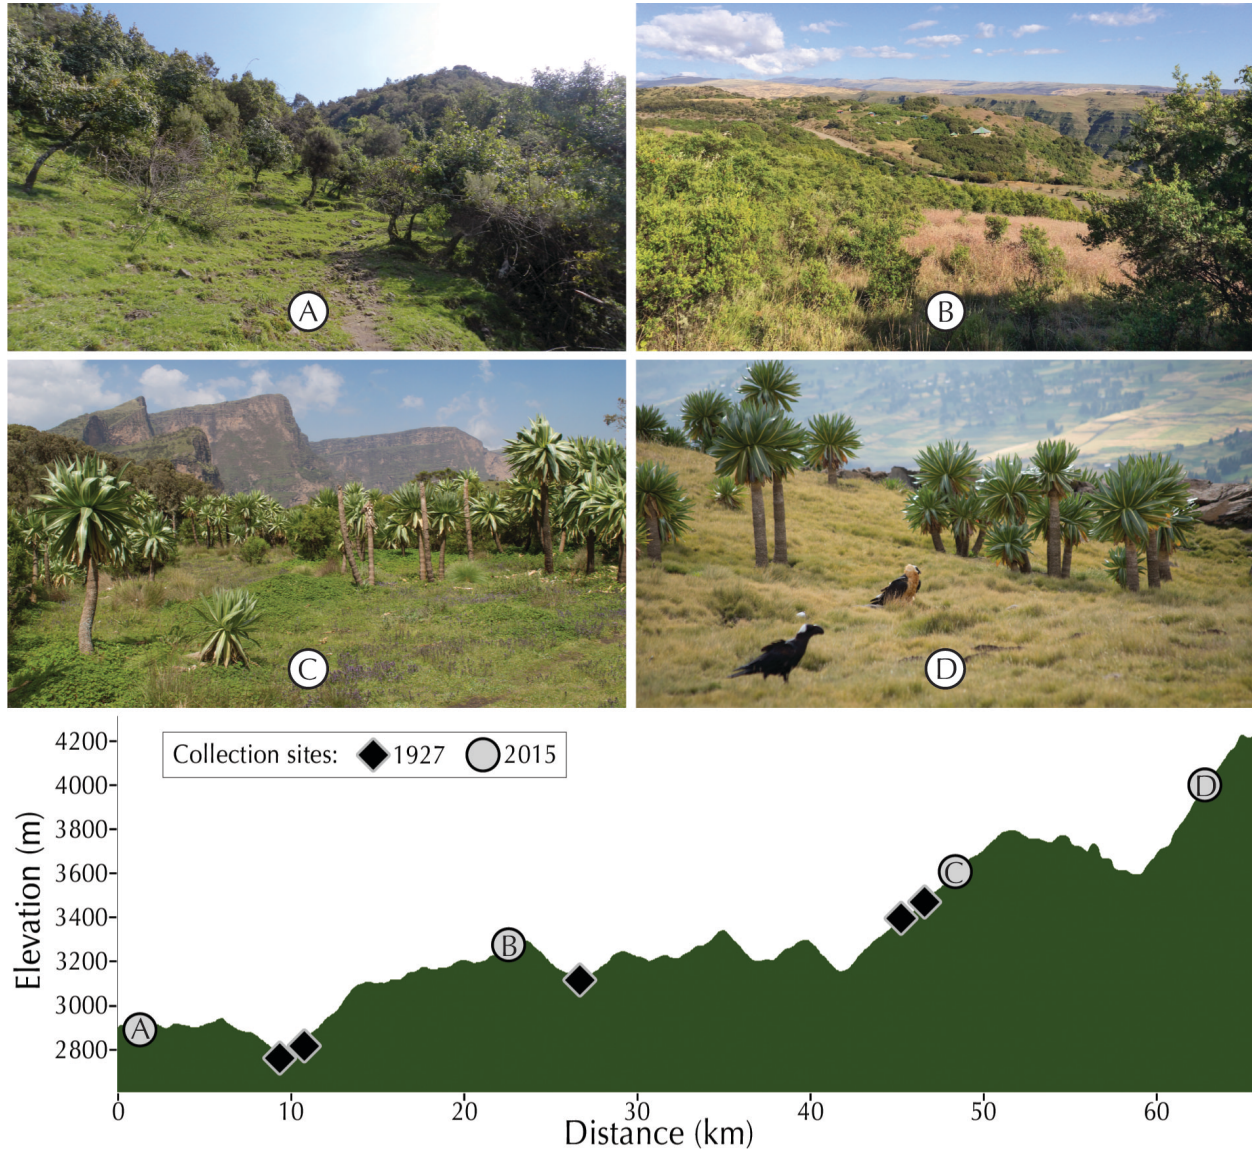

119

120 Fig. 2.—Typical habitats photographed at each site sampled between September and November 2015 in Simien  
121 Mountains National Park, Ethiopia. Site elevations and associated camp names are: (A) 2900 m, Lima Limo;  
122 (B) 3250 m, Sankaber; (C) 3600 m, Chennek; and (D) 4000 m, Sabat Minch. Elevational profile (bottom) of  
123 survey route showing approximate locations sampled in 1927 by the Chicago Daily News Abyssinian  
124 Expedition, and by us in 2015 (letters correspond to habitat photos). Photographs by YM (A), and EWC (B-D).  
125

126 Site 1: 2900 m; Lima Limo; 13.19°N, 37.89°E; 5-10 October, 2015.—The lowest site was  
127 positioned within Afromontane forest where the dominant tree species consisted of *Juniperus*  
128 *procera*, *Olea europaea*, *Rapanea simensis*, and *Hagenia abyssinica*. This site also included  
129 isolated patches of *J. procera* and eucalyptus (*Eucalyptus* sp.) monocultures.

130 Site 2: 3250 m; Sankaber; 13.23°N, 38.04°E; 22-28 November, 2015.—This site was  
131 located in a transition zone between Afromontane forest and ericaceous heathland where  
132 *Hypericum revolutum* was prevalent. *Nuxia congesta* was established on the steepest slopes and  
133 escarpments.

134 Site 3: 3600 m; Chennek; 13.26°N, 38.19°E; 21-27 September, 2015.—At this site was  
135 ericaceous heathland. Giant heather (*Erica arboea*) and the endemic giant lobelia (*Lobelia*  
136 *rhynchopetalum*) dominated the landscape.

137 Site 4: 4000 m; Sabat Minch; 13.17°N, 38.20°E; 28 September-4 October, 2015.—At the  
138 highest site *E. arborea* was scarce, while *L. rhynchopetalum* remained abundant among the  
139 grassy Afroalpine meadows.

140 *Sampling protocol.*—Trapping techniques used to capture non-volant small mammals  
141 consisted of pitfall buckets, Sherman live traps, and snap traps. We used this combination of traps  
142 to maximize our potential for sampling the highest diversity of mammals possible, as capture  
143 probabilities for each type can vary significantly among species. Pitfall lines consisted of 11  
144 plastic buckets (depth = 29.5 cm, rim diameter = 28.5 cm) spaced 5 m apart, installed in a linear  
145 sequence so that the upper rim of the opening was flush with the ground. Pitfall lines were then  
146 fitted with a 50 cm high plastic fence bisecting the opening of each bucket and running the length  
147 of the line. Trap lines consisted of 50 traps, comprised of 14 medium-sized Sherman Traps 23 ×  
148 9.5 × 8 cm (H.B. Sherman Traps Inc., Tallahassee, Florida, USA) and various snap traps: 14  
149 Museum Specials, 14 × 7 cm; 16 Victor Rat Traps, 17.5 × 8.5 cm (both manufactured by  
150 Woodstream Corporation, Lititz, Pennsylvania, USA); and 6 small snap traps manufactured in  
151 the Czech Republic that we called the “Czech Mouse Trap”, 9.5 x 4.5 cm. Selection of trap type  
152 and placement of traps and trap lines at each site was based on collector discretion, influenced



153 primarily by habitat and microhabitat features. Distances between traps within trap lines were not  
154 consistent though never exceeding 10 m. Additional details on placement of traps are provided in  
155 Stanley et al. (2011). Sites received five to seven consecutive days of trapping (detailed sampling  
156 efforts for each site are provided in Table 2). Traps and buckets were checked every morning  
157 (~0700 hrs) and afternoon (~1800 hrs). All traps (but not buckets) were baited and refreshed each  
158 afternoon with a mixture of peanut butter and canned tuna. For each 24-hour period we utilized a  
159 digital thermometer to record the minimum and maximum temperatures, and a rainfall gauge to  
160 measure any precipitation (Supplementary Data SD1).

161 *Species identification.*—Liver or spleen tissue samples were stored in 96% ethanol or  
162 Dimethyl sulfoxide (DMSO) until DNA extraction. The complete mitochondrial genome for  
163 cytochrome *b* was amplified and Sanger-sequenced (using the protocol described in Bryja et al.  
164 2014) in select individuals, representing different morphotypes (= species) and elevations.  
165 Obtained sequences were aligned with both published, and our own unpublished data for the  
166 confirmation of species identification. This was done by producing maximum likelihood tree by  
167 FastTree (Price et al. 2009) for each genus, and visual exploration of phylogenetic affinities of  
168 specimens from Simien Mts. (for specific references to each genus, see Table 1). All new  
169 sequences were submitted to GenBank under accession numbers MN223586-MN223667 (see  
170 Supplementary Data SD2).

171 *Statistical analysis.*—We use “trap-night”, “bucket-night”, and “sample-night” to clearly  
172 enumerate the sampling effort. The term “trap-night”/“bucket-night” is defined as one set  
173 trap/bucket for a 24-hour period, in this case 0700 to 0700 hours. “Sample-night” refers to the  
174 combined sampling effort (of both traps and buckets) for the same period. We describe the  
175 success rate of each method in terms of “trap success” and “bucket success”, while “sample  
176 success” refers to the combined success rate of both traps and buckets. The success rate for each

177 technique is calculated by dividing the number of individuals caught in traps or buckets by the  
178 number of trap-nights or bucket-nights, and multiplying by 100. Sample success is calculated by  
179 dividing the overall number of individuals captured from both methods by the number of sample-  
180 nights. Additional details are provided in Stanley et al. (2014).

181 To assess the sufficiency of our sampling efforts, we mapped species accumulation curves  
182 and total capture abundances for each night of trapping at each site. The Shannon index ( $H$ ) was  
183 used to measure species diversity,

$$184 \quad H = \sum [(p_i) \times \ln(p_i)]$$

185 Where  $p_i$  is the proportion of the total sample at each site represented by species  $i$ . Evenness  
186 ( $E_H$ ), was then calculated by dividing  $H$  for a given site from its maximum possible diversity  
187 ( $H_{max}=\ln S$ ), where  $S$  is the number of species observed. All statistical analyses were performed  
188 using Microsoft Excel.

189 *Ethics statement.*—Permission for the collection and export of specimens was provided  
190 by the Federal Democratic Republic of Ethiopia, Ethiopian Wildlife Conservation Authority No.  
191 229/27/08. Approval for the import of specimens into the USA was provided by the US Fish and  
192 Wildlife Service (3177-1/11/2016). All euthanized specimens followed the protocol approved by  
193 the American Society of Mammalogists (Sikes et al. 2011). The study was approved by the Field  
194 Museum of Natural History Institutional Animal Care and Use Committee (09-3).

195 *Abyssinian Expedition data collection.*—To confirm species identities and map small  
196 mammal distributions in the Simien Mountains in 1927 we referenced maps, specimen records  
197 (i.e. field catalog), journal entries, and voucher specimens deposited by the Abyssinian  
198 Expedition at FMNH. Maps provided an overview of the survey route and timeline. The field  
199 catalog provided locality and elevation data for each specimen record. Journal entries often

200 contained contextual or direct references to camps and landmarks that were used to corroborate  
201 locality data. Morphological analyses of voucher specimens confirmed species identities.  
202 Original species identities were made by W.H. Osgood.

203 *Survey comparison and analysis.*—From March 15 to April 4, 1927, the Abyssinian  
204 Expedition sampled along the western aspect of the Simien Mountains, including many localities  
205 within what is now SMNP. To maximize our ability to make direct comparisons between the two  
206 surveys, we included only localities sampled in 1927 located within the present-day boundary of  
207 SMNP in our assessment. A total of six localities met this criteria at the following elevations  
208 (rounded to the nearest 50 m): 2700 m, 2750 m, 2800 m, 3050 m, 3350 m, and 3400 m (Fig. 2).  
209 For the same reason, we consolidated localities from both surveys into four elevational ranges  
210 based on present dominant vegetation belts in SMNP: Afromontane forest (2000-2900 m),  
211 Afromontane forest/ericaceous heathland (2900-3300 m), ericaceous heathland (3300-3700 m),  
212 and Afroalpine meadows (3700+ m; Jacob et al. 2017). For clarity, we use the term “elevation  
213 zones” when referencing these ranges in the text.

214

## 215 RESULTS

216 We captured a total of 472 small mammals (349 rodents and 123 shrews) during our survey  
217 (Table 1). The rodents were represented by seven genera comprising 11 species, and the shrews  
218 by a single genus (*Crocidura*) with two species. Our total sampling effort was an accumulated  
219 6,273 sample-nights (Table 2). In 4,700 trap-nights we captured 380 small mammals with a trap  
220 success of 8.1%, 319 were rodents (6.8% trap success), and 61 were shrews (1.3% trap success).  
221 The pitfall effort of 1,573 bucket-nights yielded 92 small mammals with an overall bucket  
222 success of 5.8%, 30 were rodents (1.9% bucket success), and 62 were shrews (3.9% bucket  
223 success). *Crocidura baileyi* (weight;  $\bar{X}$  = 10.7 g) was readily caught by various traps in all three

224 of the elevations in which it was recorded. The potentially new species *Crocidura* sp. indet.  
 225 (weight,  $\bar{X}$  = 3.06 g) was only captured by pitfalls. The majority of rodents were captured by  
 226 traps, although not an uncommon occurrence in pitfall buckets. Of the 7 rodent species found in  
 227 buckets (*Dendromus lovati*, *Dendromus mystacalis*, *Lophuromys simensis*, *Mus imberbis*, *Otomys*  
 228 *simiensis*, *Otomys typus*, and *Stenocephalemys* sp. “A”), only *D. mystacalis* (weight;  $\bar{X}$  = 9.6 g)  
 229 was absent from traps.

230 **Table 1.** Elevational distribution of small mammals in Simien Mountains National Park, September-November  
 231 2015. Numbers in parentheses indicate how many individuals were used for genetic identification, based on  
 232 phylogenetic analysis of cytochrome *b* gene and comparison with published data (specified in Reference  
 233 column). GenBank accession numbers and museum (FMNH) numbers of genotyped vouchers are provided in  
 234 Supplementary Data SD2.

| Elevation                      | 2900 m | 3250 m | 3600 m | 4000 m | Totals | Reference                  |
|--------------------------------|--------|--------|--------|--------|--------|----------------------------|
| Shrew species                  |        |        |        |        |        |                            |
| <i>Crocidura baileyi</i>       | 0      | 14 (3) | 53 (8) | 22 (4) | 89     | (Lavrenchenko et al. 2009) |
| <i>Crocidura</i> sp. indet.    | 8 (2)  | 18 (4) | 8 (3)  | 0      | 34     | (Lavrenchenko et al. 2009) |
| Rodent species                 |        |        |        |        |        |                            |
| <i>Arvicanthis abyssinicus</i> | 0      | 0      | 32 (3) | 53 (4) | 85     | (Bryja et al. 2019)        |
| <i>Dendromus lovati</i>        | 0      | 3 (3)  | 8 (4)  | 6 (3)  | 17     | (Lavrenchenko et al. 2017) |
| <i>Dendromus mystacalis</i>    | 0      | 10 (1) | 0      | 0      | 10     | (Lavrenchenko et al. 2017) |
| <i>Desmomys harringtoni</i>    | 0      | 2 (2)  | 0      | 0      | 2      | (Bryja et al. 2017)        |
| <i>Lophuromys simensis</i>     | 1 (1)  | 61 (4) | 19 (4) | 0      | 81     | (Lavrenchenko et al. 2004) |
| <i>Mus mahomet</i>             | 0      | 7 (2)  | 0      | 0      | 7      | (Bryja et al. 2014)        |
| <i>Mus imberbis</i>            | 0      | 3 (3)  | 1 (1)  | 0      | 4      | (Bryja et al. 2014)        |
| <i>Otomys simiensis</i>        | 0      | 14 (3) | 0      | 0      | 14     | (Taylor et al. 2011)       |
| <i>Otomys typus</i>            | 0      | 0      | 27 (4) | 8 (3)  | 35     | (Taylor et al. 2011)       |
| <i>Stenocephalemys albipes</i> | 8 (4)  | 19 (5) | 0      | 0      | 27     | (Bryja et al. 2018)        |
| <i>Stenocephalemys</i> sp. “A” | 0      | 0      | 19 (4) | 48 (7) | 67     | (Bryja et al. 2018)        |
| Total # shrew individuals      | 8      | 32     | 61     | 22     | 123    |                            |
| Total # rodent individuals     | 9      | 119    | 106    | 115    | 349    |                            |
| Total # shrew species          | 1      | 2      | 2      | 1      | 2      |                            |
| Total # rodent species         | 2      | 8      | 6      | 4      | 11     |                            |

235

236

237 **Table 2.** Trapping results of rodents and shrews in Simien Mountains National Park, September-November  
238 2015.

| Elevation                  | 2900 m | 3250 m | 3600 m | 4000 m | Totals |
|----------------------------|--------|--------|--------|--------|--------|
| <b>Buckets</b>             |        |        |        |        |        |
| # bucket-nights            | 330    | 451    | 396    | 396    | 1573   |
| # individuals              | 9      | 43     | 26     | 14     | 92     |
| % bucket success           | 2.7    | 9.5    | 6.6    | 3.5    | 5.8    |
| # species                  | 2      | 6      | 3      | 4      | 10     |
| # shrews                   | 8      | 27     | 21     | 6      | 62     |
| % bucket success - shrews  | 2.4    | 6      | 5.3    | 1.5    | 3.9    |
| # shrew species            | 1      | 2      | 2      | 1      | 2      |
| # rodents                  | 1      | 16     | 5      | 8      | 30     |
| % bucket success - rodents | 0.3    | 3.5    | 1.3    | 2      | 1.9    |
| # rodent species           | 1      | 4      | 1      | 3      | 7      |
| <b>Traps</b>               |        |        |        |        |        |
| # trap-nights              | 1000   | 1300   | 1200   | 1200   | 4700   |
| # individuals              | 8      | 108    | 141    | 123    | 380    |
| % trap success             | 0.8    | 8.3    | 11.8   | 10.3   | 8.1    |
| # species                  | 1      | 7      | 7      | 5      | 8      |
| # rodents                  | 8      | 103    | 101    | 107    | 319    |
| % trap success - rodents   | 0.8    | 7.9    | 8.4    | 8.9    | 6.8    |
| # rodent species           | 1      | 6      | 6      | 4      | 7      |
| # shrews                   | 0      | 5      | 40     | 16     | 61     |
| % trap success - shrews    | 0      | 0.4    | 3.3    | 1.3    | 1.3    |
| # shrew species            | 0      | 1      | 1      | 1      | 1      |
| <b>Totals</b>              |        |        |        |        |        |
| # sample-nights            | 1330   | 1751   | 1596   | 1596   | 6273   |
| % sample success - shrews  | 0.6    | 1.8    | 3.8    | 1.4    | 2      |
| % sample success - rodents | 0.7    | 6.8    | 6.6    | 7.2    | 5.6    |
| % sample success - overall | 1.3    | 8.6    | 10.5   | 8.6    | 7.5    |

239

240           Rainfall was positively correlated with sampling success for shrews but not rodents

241 during the survey. At 2900 m the correlation was significant ( $p = 0.049$ ) and most pronounced,

242 with an increase in shrew captures coinciding with the period of heaviest rainfall. Product-

243 moment correlation coefficients ( $r$ ) for rainfall and shrew capture success (buckets and traps

244 combined) are 0.88 (2900 m), 0.67 (3600 m), 0.17 (4000 m), and for rodents are 0.11 (2900 m),  
245 0.39 (3600 m), and 0.24 (4000 m; Supplementary Data SD3).

246 The number of small mammals captured ranged from a low of 17 (1.3%) individuals at  
247 2900 m, to 167 (10.5%) individuals at 3600 m (Table 2). The number of shrew captures by site  
248 share the same lower and upper limits, with eight (0.6%) at 2900 m, and 61 (3.8%) at 3600 m.  
249 The number of rodents captured by site ranges from nine (0.7%) at 2900 m to 119 individuals  
250 (6.8%) at 3250 m. Species richness was greatest at 3250 m (10 species). This elevation also  
251 contained all four species (*D. mystacalis*, *Desmomys harringtoni*, *M. mahomet*, and *O. simiensis*)  
252 that occurred exclusively at one site along the survey transect (Table 1). Diversity was greatest at

253 3250 m (Shannon index,  $H = 1.86$ ). Values for evenness were similar across elevations, though  
 254 highest at 3600 m ( $E_H = 0.86$ ; Fig. 3).

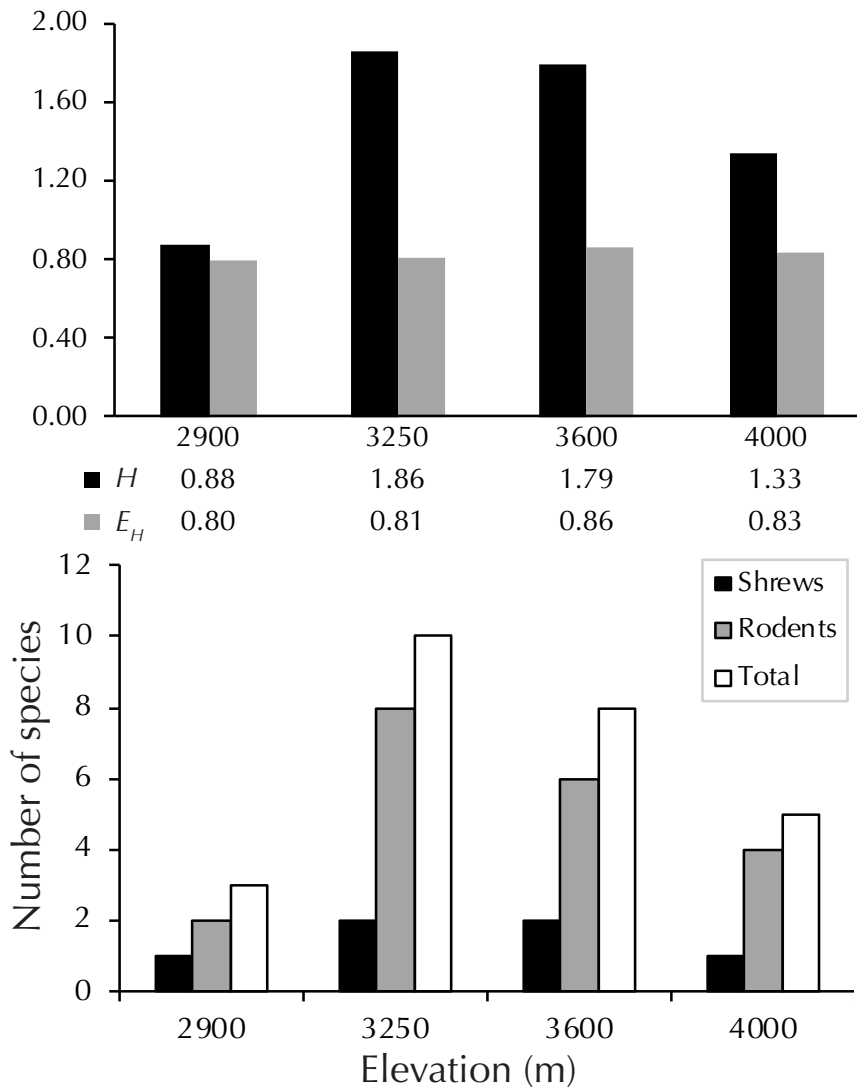

255  
 256 Fig. 3.—Diversity of small mammals at different elevations in Simien Mountains National Park. Species  
 257 richness (bottom), diversity, and evenness (rodents and shrews combined; top) are presented for each site  
 258 elevation. Calculations for Shannon's diversity ( $H$ ) and evenness ( $E_H$ ) are provided in the text.

259

260 The total number of species recorded at each site was reached by the second day of  
 261 trapping except at 2900 m, where *L. simensis* was recorded on the fourth day. Thus, species  
 262 accumulation curves reached an asymptote for each site. (Fig. 4).

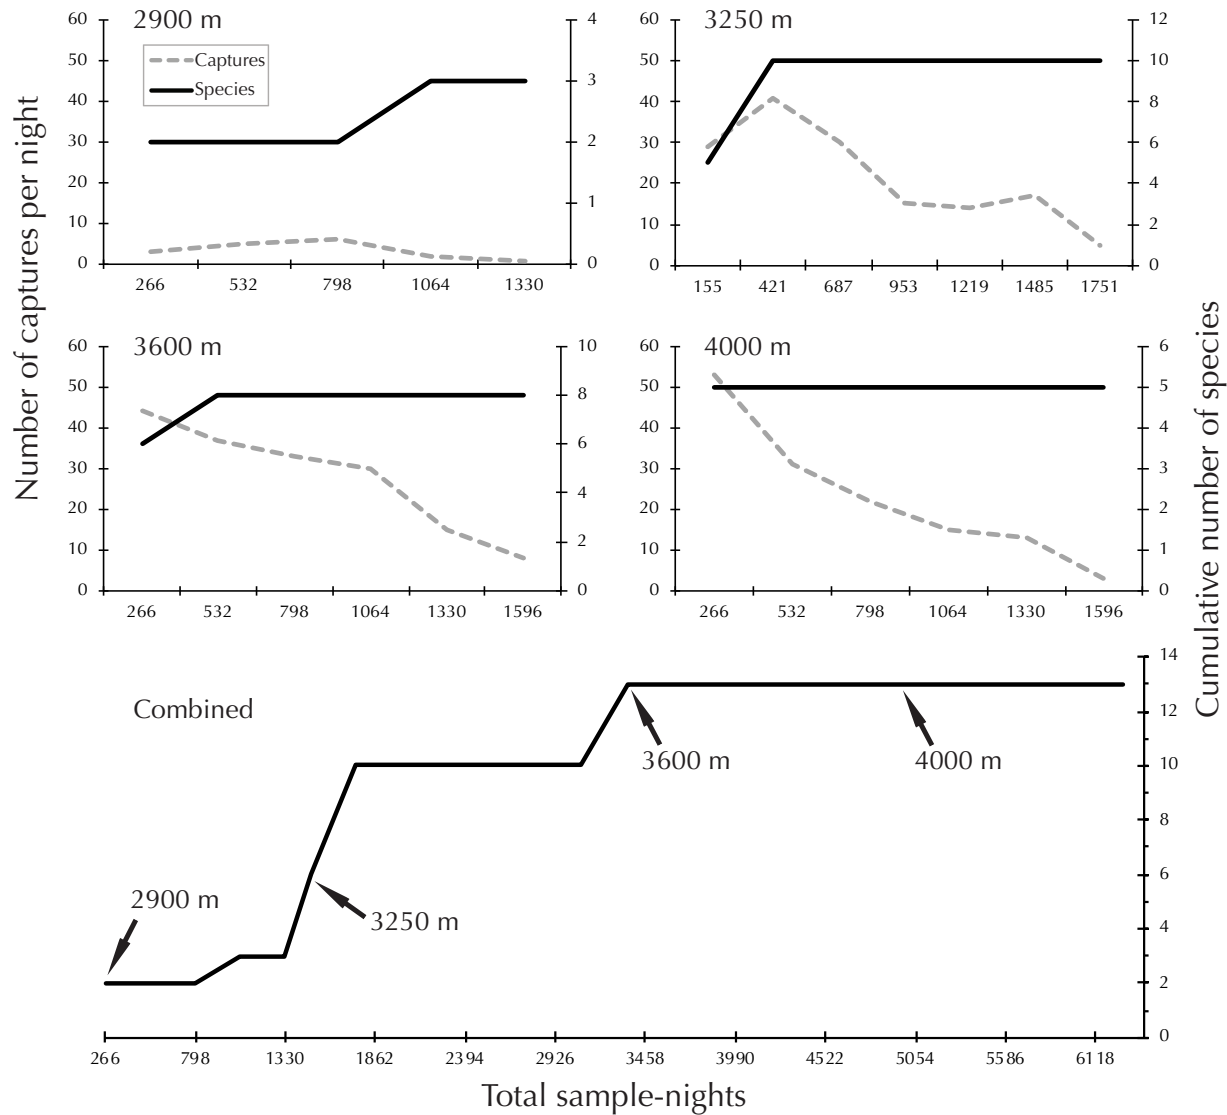

263

264 Fig. 4.—Species accumulation curves for each site (top). The dashed line represents the number of individuals  
 265 captured. The solid line represents the cumulative number of new species recorded. Species accumulation for  
 266 all sites combined (bottom); arrows indicate initiation of trapping effort at each site.



267  
268           *Abyssinian Expedition*.—A total of 101 small mammals consisting of nine species (1  
269 shrew, and 8 rodents) were recorded in the Simien Mountains by the Abyssinian Expedition of  
270 1927 (Table 3). No terrestrial small mammal species were recorded that were absent from our  
271 2015 survey. Conversely, we collected one shrew (*Crocidura* sp. indet.) and three rodent taxa (*D.*  
272 *harringtoni*, *D. mystacalis*, and *O. simiensis*) not reported by the 1927 expedition. Of these, *D.*  
273 *harringtoni*, *D. mystacalis*, and *O. simiensis* were captured exclusively at the 3250 m site in  
274 2015. Both surveys sampled the Afromontane forest, Afromontane forest/ericaceous heathland,  
275 and ericaceous heathland elevation zones (2000-2900 m, 2900-3300 m, and 3300-3700 m,  
276 respectively) while only the 2015 survey reached the Afroalpine meadows (3700+ m).

277           Among the taxa collected in both expeditions, six species (*Arvicanthis abyssinicus*,  
278 *Dendromus lovati*, *M. imberbis*, *Mus mahomet*, *O. typus*, and *Stenocephalemys* sp. “A”) were  
279 recorded at lower elevation zones in 1927 than they were in 2015. Conversely, no species were  
280 recorded at higher elevation zones in 1927 than they were in 2015. Details pertaining to field  
281 methodology were mostly undocumented by the Abyssinian Expedition, including sampling  
282 effort and trapping procedures. As a result, relative abundance data could not be generated.

283

284 **Table 3.** Number of individuals captured for each species by elevation zone in 1927 and 2015 (in parentheses)  
 285 in Simien Mountains National Park. Dashes indicate no recorded individuals. Species not recorded by the  
 286 Abyssinian Expedition in 1927 are indented. Elevation zone abbreviations: Afromontane forest (AMF);  
 287 Afromontane forest/ericaceous heathland belt (AMF/EH); ericaceous heathland (EH); Afroalpine meadow  
 288 (AAM).

| Species                                     | Elevation zones |             |             |                  |
|---------------------------------------------|-----------------|-------------|-------------|------------------|
|                                             | AMF             | AMF/EH      | EH          | AAM <sup>a</sup> |
|                                             | 2000-2900 m     | 2900-3300 m | 3300-3700 m | 3700+ m          |
| <i>Crocidura baileyi</i>                    | - (-)           | 2 (14)      | 3 (53)      | (22)             |
| <i>Crocidura</i> sp. indet.                 | - (8)           | - (18)      | - (8)       | (-)              |
| <i>Arvicanthis abyssinicus</i>              | 6 (-)           | 10 (-)      | 2 (32)      | (53)             |
| <i>Dendromus lovati</i>                     | 1 (-)           | 1 (3)       | 3 (8)       | (6)              |
| <i>Dendromus mystacalis</i>                 | - (-)           | - (10)      | - (-)       | (-)              |
| <i>Desmomys harringtoni</i>                 | - (-)           | - (2)       | - (-)       | (-)              |
| <i>Lophuromys simensis</i> <sup>b</sup>     | 8 (1)           | 6 (61)      | 12 (19)     | (-)              |
| <i>Mus imberbis</i> <sup>c</sup>            | 2 (-)           | - (3)       | 1 (1)       | (-)              |
| <i>Mus mahomet</i>                          | 1 (-)           | - (7)       | - (-)       | (-)              |
| <i>Otomys simiensis</i>                     | - (-)           | - (14)      | - (-)       | (-)              |
| <i>Otomys typus</i>                         | 4 (-)           | 1 (-)       | 10 (27)     | (8)              |
| <i>Stenocephalemys albipes</i> <sup>d</sup> | 13 (8)          | - (19)      | - (-)       | (-)              |
| <i>Stenocephalemys</i> sp. "A" <sup>e</sup> | 5 (-)           | 7 (-)       | 3 (19)      | (48)             |
| Totals                                      | 40 (9)          | 27 (107)    | 34 (159)    | (137)            |

289 <sup>a</sup>Not sampled in 1927, 2015 results are provided for context. Originally named by Osgood in 1927:

290 <sup>b</sup>*Lophuromys flavopunctatus simensis*, <sup>c</sup>*Muriculus imberbis imberbis*, <sup>d</sup>*Myomys albipes*, and <sup>e</sup>*Stenocephalemys*  
 291 *griseicauda*.

292

293

## DISCUSSION

294

*Community reassessment: possible elevational shifts over 88 years.*—Small mammal

295

sampling along the same route in the Simien Mountains after almost nine decades provides a

296

unique opportunity to analyze the changes in the distribution of species. Our results indicate that

297

multiple species have experienced some form of upward movement in their elevational ranges

298

since 1927 (Table 3). For example, the Abyssinian Expedition collected *A. abyssinicus* across all

299

elevation zones sampled. Despite the majority of these individuals (89%;  $n = 16$ ) being captured

300

from the lowest elevation zones (Afromontane forests and Afromontane/ericaceous heathland

301 belt; 2000-3300 m) in 1927, we did not collect any in this range. We began collecting *A.*  
302 *abyssinicus* in ericaceous heathlands (3300-3700 m;  $n = 32$ ) and found them in even greater  
303 abundance amongst the higher Afroalpine meadows (3700+ m;  $n = 53$ ). We found a similar  
304 pattern for *O. typus* and *Stenocephalemys* sp. “A”; both recorded across all three elevation zones  
305 sampled by the 1927 Abyssinian Expedition. *Otomys typus* was absent from our trapping in the  
306 Afromontane forest and Afromontane forest/ericaceous heathland zones (2000-3300 m) but was  
307 found higher in the ericaceous heathland (3300-3700 m;  $n = 27$ ) and Afroalpine meadows (3700+  
308 m;  $n = 8$ ). We also found *S.* sp. “A” only in these two highest elevation zones where it exhibited a  
309 notable increase in abundance amongst the high Afroalpine meadows (3700+ m;  $n = 48$ ), more  
310 than doubling in yield from the lower ericaceous heathlands (3300-3700;  $n = 19$ ). The  
311 distributional shift in *S. albipes* is again in the same direction. In 1927 it was found only in the  
312 lowest Afromontane forest, while our recent survey found it abundant also in the Afromontane  
313 forest/ericaceous heathland zone at 3250 m. Other species were less abundant, and it is therefore  
314 difficult to make strong conclusions, but they also suggest similar distributional changes. In 2015,  
315 *D. lovati* was not captured in the Afromontane forest (2900 m), but it was documented in this  
316 zone in 1927. Similarly, the lone specimen of *M. mahomet* documented by the Abyssinian  
317 Expedition was collected in the Afromontane forest (2000-2900 m), while we collected all  
318 individuals ( $n = 7$ ) in the higher Afromontane forest/ericaceous heathland zone (3000-3300 m).

319         Considering our intensive sampling, the absence of multiple species at lower elevations in  
320 2015—despite having been documented there in 1927—indicates upward range contractions have  
321 occurred. No species experienced a downward range contraction, as we collected all species at  
322 the highest elevation zones from which they were documented in 1927. The most parsimonious  
323 explanation for these changes include elevational shifts in habitat types, caused by a changing  
324 climate. It is expected that increasing mean temperatures associated with global warming might

325 shift particular ecosystems to higher latitudes and elevations (Sundqvist et al. 2013). As most  
326 small mammal species are habitat specialists, one would also expect similar shifts in their  
327 distribution as we see in our data. An indication of this climatic effect occurring in SMNP is a  
328 rising treeline in areas receiving low anthropogenic pressure (Jacob et al. 2017). However, there  
329 are also other factors that should be considered when comparing our results with those obtained  
330 in 1927. First, the degradation of habitats by human activities (e.g. overgrazing, deforestation)  
331 has intensified in last decades, especially at lower elevations. It is therefore possible that upward  
332 elevational shifts were forced by human activities. Second, we have not genotyped the material  
333 from 1927 expedition and there is a possibility that material of two genera collected at lower  
334 elevations belong to other species than those we observed in higher elevation zones. Lower  
335 elevations of northern Ethiopia can be inhabited by *Arvicanthis niloticus*, but it has not been yet  
336 reported from SMNP despite intensive sampling in the last decade (Bryja et al. 2019). Also, we  
337 have not performed any genetic analysis of *Otomys* collected in 1927. However, our  
338 morphological analysis of *Otomys* collected in 1927 confirmed their belonging to the *O. typus*  
339 morphotype (sensu Taylor et al. 2011). Third, our recent survey employed pitfall buckets that  
340 allowed us to collect some taxa difficult to document by standard traps (e.g. *Dendromus*, *Mus*,  
341 *Crocidura*). In particular, the absence of species with low body mass can be attributed to the fact  
342 that the Abyssinian Expedition employed only traps, while we collected most of these specimens  
343 using buckets. Finally, all four species absent in 1927 appear to be more or less specialized to the  
344 band of transition between Afromontane forest and ericaceous heathland. This habitat  
345 corresponds to the 3250 m site (Sankaber Camp) in our survey and is where we found *C. sp.*  
346 indet. in greatest abundance, and *Dendromus mystacalis*, *Desmomys harringtoni*, and *O.*  
347 *simiensis*, exclusively. During the survey we observed this unique heterogenous habitat to be  
348 remarkably narrow with well-defined upper and lower limits. For this reason, it is conceivable

349 that the Abyssinian Expedition simply “missed” sampling here along the survey route (nearest  
350 sampling localities in 1927: 3050 m and 3350 m). Note that in the likely event rising  
351 temperatures over the past century caused an upward shift in this transition zone, it would have  
352 been located lower in 1927 than it is today, and farther from the Abyssinian Expedition’s nearest  
353 sampled locality of 3350 m.

354 *Extreme small mammal endemism in SMNP.*—All 13 species documented by our survey  
355 are endemic to the Ethiopian Plateau (photographs of select taxa are provided in Supplementary  
356 Data SD4). Approximately half (54%;  $n = 7$ ) are also endemic to the Simien Mountains,  
357 including three that resulted from type specimens collected during the Abyssinian Expedition and  
358 described by Osgood (i.e. *A. abyssinicus*, *C. baileyi*, and *L. simensis*; 1936). We expect to  
359 describe *C. sp. indet.* as a new taxon as well. Together, these four species account for well over  
360 half of our total collected specimens (61%;  $n = 289$ ).

361 While all species are confined to Ethiopian highlands, some display more restricted  
362 ranges than others (Bryja et al. in press, for summary on rodents). Based on current taxonomic  
363 and biogeographic knowledge, we can separate rodents of SMNP into three main groups. The  
364 first comprises species relatively widespread in low to middle elevations of the Ethiopian  
365 highlands on both sides of the Great Rift Valley. In addition to *S. albipes*, we can also include the  
366 following in this group: *Dendromus mystacalis*, *Desmomys harringtoni*, and *M. mahomet*. The  
367 second group is formed by high-elevation species, endemic to the highest mountains in the north-  
368 western part of the Ethiopian highlands (*A. abyssinicus*, *L. simensis*, *O. simiensis*, *O. typus*, *S. sp.*  
369 “A”). Besides SMNP, most of these species are restricted to only a few other high mountain  
370 chains, e.g. Mt. Guna, Mt. Choqa or Abohoy Gara (Abuna Yosef). The third group is formed by  
371 *M. imberbis* and *D. lovati*—both species are known from the highest mountains on both sides of

372 the Rift Valley (Bryja et al. in press; Meheretu et al. 2015), but are very rare or difficult to detect,  
373 and most records outside SMNP originate from Bale or Arsi Mts. in southeastern Ethiopia.

374 Both species of *Crocidura* are restricted to the highlands west of the Rift Valley, and  
375 SMNP is the only region from where they were confirmed genetically. *Crocidura baileyi* is  
376 considered a benchmark for the Simien Afroalpine community and Lavrenchenko et al. (2016)  
377 also mentioned its distribution in other mountains west of the Rift Valley (e.g. Debre Sina and  
378 Ankober). However, our recent genetic data suggest that high-elevation populations from Abohoy  
379 Gara Mts., Borena Saynt NP, and Ankober are very distinct—at least in mitochondrial DNA—  
380 and would require more taxonomic work. The second species, *C. sp. indet.*, was first observed in  
381 a pitfall bucket at the 3600 m site and comprised 34 of the 123 (28%) soricids. It is a small, dark,  
382 shrew with an overall appearance that conspicuously differentiates it from other members of the  
383 genus in the region (total length, ca. 85 mm; tail length, ca. 35 mm; weight, ca. 3 g). Awaiting  
384 proper integrative taxonomic analysis, analysis of cytochrome *b* sequences suggests it may  
385 represent a sister taxon to *C. bottegi* (Lavrenchenko et al. 2009). In summary, SMNP can be  
386 considered an extremely valuable core area of Ethiopian endemism while also representing the  
387 best protected natural habitat in northern Ethiopia. Continued protection of SMNP will not only  
388 safeguard these rare and endemic small mammals, but also provide a potential refuge for lower  
389 elevation species responding to rising global temperatures.

390 *The role of elevation: diversity and abundance.*—Species richness was greatest at the  
391 3250 m site, with eight rodent and two shrew species. This is consistent with a pattern of peak  
392 species richness for non-volant small mammals at mid-elevations as has been reported by several  
393 montane studies worldwide (Brown 2001; Goodman and Rasolonandrasana 2001; McCain 2004;  
394 Rickart et al. 2011; Stanley et al. 2014; Stanley and Kihale 2016). In the context of continental  
395 Africa, however, Taylor et al. argues (2015) such hump-shaped distributions are the exception

396 rather than the rule. Other surveys of non-volant small mammals on Eastern African mountains  
397 that are similar in scale to the Simiens have produced mixed results. On Africa's highest  
398 mountain, Mt. Kilimanjaro, peak species richness (14 species) was recorded at the mid-elevation  
399 of 3000 m before plummeting at the higher 3500 m and 4000 m sites (four and six species,  
400 respectively; Stanley et al. 2014). A recent survey of Mt. Kenya (which coincided with our  
401 SMNP survey in September and October, 2015) provides elevational distribution data for two  
402 opposing slopes of the massif, Chogoria (southeast) and Sirimon (northwest). While mid-  
403 elevations produced peak species richness on both slopes, the Sirimon slope recorded an  
404 additional peak at its lowest elevation (Musila et al. 2019). The Rwenzori Mountains with its  
405 exceptionally speciose small mammal community represents perhaps the greatest contradiction to  
406 the hump-shaped distribution hypothesis in Eastern Africa. Here, species richness was found to  
407 decrease monotonically with each increase in sampling elevation (Kerbis Peterhans et al. 1998).  
408 Fittingly, the distribution that most resembled our results in SMNP was that of the Bale  
409 Mountains (located opposite the Simiens on the east side of the rift valley; see Fig. 1). Here,  
410 Yalden (1988) recorded peak species richness at 3200 m within a similarly shaped overall  
411 distribution to SMNP. Yalden's description of the elevational profile of habitats in Bale is also  
412 remarkably similar to what we observed in SMNP. Perhaps most noteworthy is the mention of a  
413 heterogenous zone of transition where the forest ends and erica bush begins until reaching "a sharp  
414 upper treeline at 3250 m" (Yalden 1988). The concentration of species occurring at this elevation  
415 in the Simien and Bale Mountains may exemplify a theory put forth by Brown (2001) that species  
416 richness may be amplified at a given elevation when two conditions are met: 1) species having  
417 different habitat requirements overlap in their distributions; and 2) this occurs at the most  
418 productive point in the gradient (Brown 2001).

419           Given the relative size of the Simien massif, 3250 m represents the truest middle  
420 elevation from our survey, as our lowest site of 2900 m near the base camp of SMNP was fairly  
421 high compared to the surrounding plateau (ca. 2000 m). The 2900 m site also recorded a  
422 substantially lower sample success of 1.3% (Table 2). Park staff informed us that livestock no  
423 longer grazed in the area of natural Afromontane forest in which we placed a portion of our traps  
424 (33% of buckets and 50% of traplines), however, we believe our results may reflect the effects of  
425 the former disturbance. Future surveys incorporating an alternate locality within this elevational  
426 range would help confirm whether or not this is the case.

427           Although not initially included as one of our objectives for the study, we found a  
428 correlation between elevation and average weight among congeners. For each of the five genera  
429 represented by two species (*Crocidura*, *Dendromus*, *Mus*, *Otomys*, and *Stenocephalemys*), the  
430 highest average weight consistently belonged to that of the higher elevation species. This  
431 observation may be explained by Bergmann's initial rule (i.e. *interspecific* variation among  
432 congeners) as applied to elevation (Bergmann 1847). While studies have investigated the merits  
433 of Bergmann's Rule *intraspecifically* within mammals by latitude (Taylor et al. 2015), none have  
434 tested the prediction between closely related taxa as it relates to elevation. Be that as it may,  
435 additional research would be required to differentiate our results from coincidence.

436           *Methodological implications.*—The trap types and techniques used at each site were  
437 effective in sampling the small mammal communities along the elevational transect. Only the  
438 lowest site (2900 m) recorded a new species beyond the second day of trapping (Fig. 4).  
439 Therefore, we are confident that our survey offers a complete assessment of the rodent and shrew  
440 communities occurring at each site. Previous surveys in Eastern Africa have achieved similar  
441 success using the same sampling protocol (Stanley and Hutterer 2007; Stanley et al. 2014;  
442 Stanley and Kihale 2016). Included among these is a survey of Mt. Kilimanjaro that—like our



443 survey—accumulated all species for a site on the first day of trapping at the highest elevation  
444 (4000 m; Stanley et al. 2014). The lower habitat heterogeneity at such high elevations may allow  
445 for sampling entire communities with greater efficiency, however additional research would be  
446 required to confirm this theory. Nevertheless, the ability to collect reliable data on species  
447 richness and abundance in short order is virtually always in the practical interests of those  
448 conducting community assessments.

449 Our trapping results underscore the necessary role of pitfall buckets in thoroughly  
450 sampling non-volant small mammal communities. Pitfall buckets are often more effective at  
451 capturing the smallest mammals (weight ca. < 10 g) when compared to Sherman and snap trap  
452 varieties. For example, both *C. sp. indet.* and *D. mystacalis* (weight ca. 3 g and 9 g, respectively)  
453 were captured exclusively in buckets. However, deviations from this general association do occur  
454 and should be considered to avoid sampling biases. For example, despite *M. mahomet*'s relatively  
455 small size (weight, ca. 8.5 g), it was only captured by traps. Conversely, the majority of *D. lovati*  
456 (weight, ca. 18 g) captures were found in buckets. This species has been reported to be “not very  
457 common, at least in trapping yields” as well as having an upper range limit of 3550 m (Dieterlen  
458 2005). However, *D. lovati* was not particularly uncommon in our survey ( $n = 17$ ), even at 4000  
459 m. Sampling bias caused by the absence or underutilization of pitfall buckets in previous surveys  
460 may account for their ‘rarity’.

461 Rain was rare during the survey (see Supplementary Data SD1). However, we found a  
462 significant positive correlation between rainfall and *C. sp. indet.* captures at the 2900 m site. For  
463 the two sample-nights following rain at the 3600 m site, the number of *C. sp. indet.* captures  
464 again increased, whereas *C. baileyi* captures remained unaffected, or decreased. The 4000 m site  
465 experienced the greatest amount of rainfall, yet it had no discernable effect on *C. baileyi* captures  
466 (*C. sp. indet.* was absent from this site). Many studies have found a correlation between rainfall

467 and sampling bias for shrews outside tropical Africa (McCay 1996; Ford et al. 2002), however  
468 given our results it would be interesting to see whether or not other similar events are specific to  
469 tiny shrews which may share a more ‘fragile’ ecology because of their size.

470 *Conclusion.*—This year (2019) marks the 50<sup>th</sup> Anniversary of SMNP. Since its  
471 establishment, the park has faced constant pressure from human activity in the region, such as  
472 livestock grazing, wood harvesting, and military conflict. At the same time, the climate has  
473 warmed by 1.5° C (Jacob et al. 2017). As increasing rates of global warming continues, many  
474 lower elevation species may track suitable habitats as they shift to higher elevations. There is still  
475 much to be learned about how small mammal communities are responding to climate change, and  
476 montane ecosystems such as SMNP provide a practical means to study these biotic variations  
477 along elevational gradients over time. Only by understanding these systems can we develop  
478 effective conservation strategies to defend against any future ecological consequences of climate  
479 change in these areas of high endemism inherently prone to species loss. Therefore, as Ethiopia’s  
480 remarkable endowment of endemic mammalian biota continues to be described and documented,  
481 so does the call for continued research and conservation.

482

#### 483 ACKNOWLEDGMENTS

484 Funding for this study came from the Field Museum of Natural History: Gantz Family  
485 Collections Center, Tanzania Research Fund; and the Council on Africa. We are appreciative to  
486 The Ethiopian Wildlife Conservation Authority (EWCA) and Simien Mountains National Park  
487 office for their cooperation and assistance in carrying out this study. Mekelle University provided  
488 essential logistical support and transportation. Genetic analysis of selected small mammals was  
489 performed by A. Bryjová within the Czech Science Foundation project no. 18-17398S. B. Besch  
490 created maps of Ethiopia and the study area. S. Goodman, A. Hailemariam, Y. Kidane, B.

491 Kahsay, B. Gebru, A. Birrara, and K. Craig provided critical field and logistical support. L.  
492 Heaney and B. Marks offered invaluable guidance and editorial advice. M.A. Rogers, R.  
493 Banasiak and L. Smith were vital in processing the collection. A. Birara, B. Gebre, F.  
494 Welegebrial, G. Brhane, G. Wondaya, W. Hayelom, Y. Kidanu and 3<sup>rd</sup> year postgraduate  
495 (summer) and undergraduate (regular) biology students joined in the field training in SMNP in  
496 2015.

497  
498

#### LITERATURE CITED

- 499 BERGMANN, C. 1847. Über die Verhältnisse der Wärmeökonomie der Thiere zu ihrer Grösse.  
500 Göttinger Studien 3:595–708.
- 501 BROWN, J. H. 2001. Mammals on mountainsides: elevational patterns of diversity. *Global*  
502 *Ecology & Biogeography* 10:101–109.
- 503 BRYJA, J. ET AL. 2014. Pan-African phylogeny of *Mus* (subgenus *Nannomys*) reveals one of the  
504 most successful mammal radiations in Africa. *BMC Evolutionary Biology* 14:1–20.
- 505 BRYJA, J. ET AL. 2017. Evolutionary history of the thicket rats (genus *Grammomys*) mirrors the  
506 evolution of African forests since late Miocene. *Journal of Biogeography* 44:182–194.
- 507 BRYJA, J. ET AL. 2018. Reticulate Pleistocene evolution of Ethiopian rodent genus along  
508 remarkable altitudinal gradient. *Molecular Phylogenetics and Evolution* 118:75–87.
- 509 BRYJA, J. ET AL. 2019. Diversity and evolution of African Grass Rats (Muridae: *Arvicanthis*)—  
510 From radiation in East Africa to repeated colonization of northwestern and southeastern  
511 savannas. *Journal of Zoological Systematics and Evolutionary Research*:1–19.
- 512 BRYJA, J., Y. MEHERETU, R. ŠUMBERA, AND L. A. LAVRENCHENKO. no date. Annotated check-list,  
513 taxonomy and distribution of rodents in Ethiopia. *Folia Zoologica*.
- 514 CHEN, I.-C., J. K. HILL, R. OHLEMÜLLER, D. B. ROY, AND C. D. THOMAS. 2011. Rapid range shifts

- 515 of species associated with high levels of climate warming. *Science* 333:1024–1026.
- 516 CHERNET, T. 2015. A resource base and climate change risk maps for Simien Mountains National  
517 Park. Addis Ababa.
- 518 DIETERLEN, F. 2005. Climbing mice of the genus *Dendromus* (Nesomyidae, Dendromurinae) in  
519 Sudan and Ethiopia, with the description of a new species. *Bonner zoologische Beiträge*  
520 56:185–200.
- 521 EJIGU, D., A. BEKELE, AND L. POWELL. 2017. Walia ibex have increased in number and shifted  
522 their habitat range within Simien Mountains National Park , Ethiopia. *Journal of Mountain*  
523 *Ecology* 10:27–44.
- 524 FORD, W. M., C. A. DOBONY, AND J. W. EDWARDS. 2002. Shrews in managed northern hardwood  
525 stands in the Allegheny Mountains of West Virginia.
- 526 FUERTES, L. A., AND W. H. OSGOOD. 1936. *Artist and naturalist in Ethiopia*. Doubleday, Doran,  
527 Garden City, N.Y.
- 528 GOODMAN, S. M., AND B. P. N. RASOLONANDRASANA. 2001. Elevational zonation of birds,  
529 insectivores, rodents and primates on the slopes of the Andringitra Massif, Madagascar.  
530 *Journal of Natural History* 35:285–305.
- 531 HOFMANN, C. ET AL. 1997. Timing of the Ethiopian flood basalt event and implications for plume  
532 birth and global change. *Nature* 389:838–841.
- 533 IUCN. 2019. Key Regions. *IUCN SSC Small Mammals Specialists Group*. <[http://www.small-](http://www.small-mammals.org/)  
534 [mammals.org/](http://www.small-mammals.org/)> (29 May 2019).
- 535 JACOB, M. ET AL. 2017. Land cover dynamics in the Simien Mountains (Ethiopia), half a century  
536 after establishment of the National Park. *Regional Environmental Change* 17:777–787.
- 537 KERBIS PETERHANS, J. C., R. M. KITYO, W. T. STANLEY, AND P. K. AUSTIN. 1998. Small  
538 mammals along an elevational gradient in Rwenzori Mountains National Park, Uganda. Pp.

- 539 149–171 in *The Rwenzori Mountains National Park, Uganda. Exploration, environment and*  
540 *biology. Conservation, management and community relations* (H. Osmaston, J. Tukahirwa,  
541 C. Basalirwa & J. Nyakaana, eds.). Makerere University, Kampala.
- 542 LAVRENCHENKO, L. A. ET AL. 2004. Divergent and reticulate processes in evolution of Ethiopian  
543 *Lophuromys flavopunctatus* species complex: Evidence from mitochondrial and nuclear  
544 DNA differentiation patterns. *Biological Journal of the Linnean Society* 83:301–316.
- 545 LAVRENCHENKO, L. A., A. A. BANNIKOVA, AND V. S. LEBEDEV. 2009. Shrews (*Crocidura* spp.)  
546 endemic to Ethiopia: Recent adaptive radiation of an ancient lineage. *Doklady Biological*  
547 *Sciences* 424:57–60.
- 548 LAVRENCHENKO, L. A., AND A. BEKELE. 2017. Diversity and conservation of Ethiopian  
549 mammals: what have we learned in 30 years? *Ethiopian Journal of Biological Sciences*  
550 16:1–20.
- 551 LAVRENCHENKO, L. A., R. S. NADJALOVA, A. BEKELE, T. A. MIRONOVA, AND J. BRYJA. 2017.  
552 Phylogenetic position of a monotypic Ethiopian endemic rodent genus *Megadendromus*  
553 (Rodentia, Nesomyidae). *Mammalia* 81:71–82.
- 554 LAVRENCHENKO, L. A., L. L. VOYTA, AND R. HUTTERER. 2016. Diversity of shrews in Ethiopia,  
555 with the description of two new species of *Crocidura* (Mammalia: Lipotyphla: Soricidae).  
556 *Zootaxa* 4196:38–60.
- 557 MACARTHUR, R. H. 1972. *Geographical ecology: patterns in the distribution of species*. Princeton  
558 University Press, Princeton, N.J.
- 559 MCCAIN, C. M. 2004. The mid-domain effect applied to elevational gradients: species richness of  
560 small mammals in Costa Rica. *Journal of Biogeography* 31:19–31.
- 561 MCCAIN, C. M. 2005. Elevational gradients in diversity of small mammals. *Ecology* 86:366–372.
- 562 MCCAY, T. S. 1996. Response of masked shrews (*Sorex cinereus*) to precipitation in irrigated and

- 563 nonirrigated Forests. *American Midland Naturalist* 135:178–180.
- 564 MEHERETU, Y., R. ŠUMBERA, AND J. BRYJA. 2015. Enigmatic Ethiopian endemic rodent  
565 *Muriculus imberbis* (Rüppell 1842) represents a separate lineage within genus *Mus*.  
566 *Mammalia* 79:15–23.
- 567 MORITZ, C., J. L. PATTON, C. J. CONROY, J. L. PARRA, G. C. WHITE, AND S. R. BEISSINGER. 2008.  
568 Impact of a century of climate change on small-mammal communities in Yosemite National  
569 Park, USA. *Science* 322:261–264.
- 570 MUSILA, S. ET AL. 2019. Diversity and distribution patterns of non-volant small mammals along  
571 different elevation gradients on Mt. Kenya, Kenya. *Zoological Research* 40:53–60.
- 572 OSGOOD, W. H. 1936. New and imperfectly known small mammals from Africa. *Fieldiana:*  
573 *Zoology* 20:217–256.
- 574 PRICE, M. N., P. S. DEHAL, AND A. P. ARKIN. 2009. Fasttree: Computing large minimum  
575 evolution trees with profiles instead of a distance matrix. *Molecular Biology and Evolution*  
576 26:1641–1650.
- 577 RAHBEK, C. 2005. The role of spatial scale and the perception of large-scale species-richness  
578 patterns. *Ecology Letters* 8:224–239.
- 579 RICKART, E. A., L. R. HEANEY, D. S. BALETE, AND B. R. TABARANZA. 2011. Small mammal  
580 diversity along an elevational gradient in northern Luzon, Philippines. *Mammalian Biology*  
581 - *Zeitschrift für Säugetierkunde* 76:12–21.
- 582 ROWE, R. J., J. A. FINARELLI, AND E. A. RICKART. 2010. Range dynamics of small mammals  
583 along an elevational gradient over an 80-year interval. *Global Change Biology* 16:2930–  
584 2943.
- 585 SIKES, R., W. GANNON, AND THE ANIMAL CARE AND USE COMMITTEE OF THE AMERICAN SOCIETY  
586 OF MAMMOLOGISTS. 2011. Guidelines of the American Society of Mammalogists for the use

- 587 of wild mammals in research. *Journal of Mammalogy* 92:235–253.
- 588 STANLEY, W. T., S. M. GOODMAN, AND W. D. NEWMARK. 2011. Small mammal inventories in the  
589 East and West Usambara Mountains, Tanzania. 1. Study Areas, methodologies, and general  
590 results. *Fieldiana Life and Earth Sciences* 4:1–17.
- 591 STANLEY, W. T., AND R. HUTTERER. 2007. Differences in abundance and species richness  
592 between shrews and rodents along an elevational gradient in the Udzungwa Mountains,  
593 Tanzania. *Acta Theriologica* 52:261–275.
- 594 STANLEY, W. T., AND P. M. KIHAULE. 2016. Elevational Distribution and Ecology of Small  
595 Mammals on Tanzania’s Second Highest Mountain. *PLOS ONE* 11:e0162009.
- 596 STANLEY, W. T., M. A. ROGERS, P. M. KIHAULE, AND M. J. MUNISSI. 2014. Elevational  
597 distribution and ecology of small mammals on Africa’s highest mountain. *PLOS ONE* 9:1–  
598 15.
- 599 SUNDQVIST, M. K., N. J. SANDERS, AND D. A. WARDLE. 2013. Community and ecosystem  
600 responses to elevational gradients: processes, mechanisms, and insights for global change.  
601 *Annual Review of Ecology, Evolution, and Systematics* 44:261–280.
- 602 TAYLOR, P. J. ET AL. 2011. Specific limits and emerging diversity patterns in East African  
603 populations of laminate-toothed rats, genus *Otomys* (Muridae: Murinae: Otomyini):  
604 Revision of the *Otomys typus* complex. *Zootaxa*. 1st edition. Magnolia Press, Auckland,  
605 New Zealand.
- 606 TAYLOR, P. J., A. MUNYAI, I. GAIGHER, AND R. BAXTER. 2015. Afromontane small mammals do  
607 not follow the hump-shaped rule: altitudinal variation in the Soutpansberg Mountains, South  
608 Africa. *Journal of Tropical Ecology* 31:37–48.
- 609 UNESCO. 2019. Simien National Park. *World Heritage List*. <<http://whc.unesco.org/en/list/>> (29  
610 May 2019).

- 611 WALTHER, G.-R. ET AL. 2002. Ecological responses to recent climate change. *Nature* 416.
- 612 YALDEN, D. W. 1988. Small mammals of the Bale Mountains, Ethiopia. *African Journal of*
- 613 *Ecology* 26:281–294.
- 614
